1 **Werewolf, there wolf: variants in *Hairless* associated with hypotrichia and roaning**  
2 **in the lykoi cat breed.**

3

4 Reuben M. Buckley<sup>\*1</sup>, Barbara Gandolfi<sup>\*1</sup>, Erica K. Creighton<sup>1</sup>, Connor A. Pyne<sup>1</sup>,  
5 Michelle L. LeRoy<sup>1,2</sup>, David A. Senter<sup>1,2</sup>, Delia M. Bouhan<sup>1</sup>, Johnny R. Gobble<sup>3</sup>, Marie  
6 Abitbol<sup>4,5</sup>, Leslie A. Lyons<sup>1</sup>, 99 Lives Consortium

7

8 <sup>1</sup>Department of Veterinary Medicine and Surgery, College of Veterinary Medicine,  
9 University of Missouri, Columbia, MO, USA  
10

11 <sup>2</sup>Veterinary Allergy and Dermatology Clinic, LLC., Overland Park, KS 66210 USA  
12

13 <sup>3</sup>Tellico Bay Animal Hospital, Vonore, TN 37885 USA  
14

15 <sup>4</sup>NeuroMyoGène Institute, CNRS UMR5310, INSERM U1217, Faculty of Medicine,  
16 Rockefeller, Claude Bernard Lyon I University, Lyon, France.  
17

18 <sup>5</sup>Univ Lyon, VetAgro Sup, Marcy-l'Etoile, France.  
19  
20

21 Corresponding author email: [lyonsla@missouri.edu](mailto:lyonsla@missouri.edu);

22 Phone: (573) 884 – 2287

23 Lyons ORCID: 0000-0002-1628-7726  
24

25 Running title: *Hairless* variants in domestic cats  
26

27 Keywords: atrichia, domestic cat, *Felis catus*, fur, *HR*, naked  
28

29 **Acknowledgements**

30 Funding was provided in part by the Gilbreath McLorn Endowment of the College of  
31 Veterinary Medicine, University of Missouri, Cat Health Network (D14FE-552), the Winn  
32 Feline Foundation (W16-030) (LAL). We appreciate the assistance of cat breeders,  
33 including Patti Thomas, Cheryl Kerr and Christine Boulanger. Photographs were  
34 provided courtesy of Brittney Gobble. We appreciate technical assistance and support  
35 with the manuscript from Thomas R. Juba, technical assistance from Nicholas A.  
36 Gustafson' and assistance with figures from Karen Clifford.

37

38 **Abstract**

39 A variety of cat breeds have been developed via novelty selection on aesthetic,  
40 dermatological traits, such as coat colors and fur types. A recently developed breed, the  
41 lykoi, was bred from cats with a sparse hair coat with roaning, implying full color and all  
42 white hairs. The lykoi phenotype is a form of hypotrichia, presenting as significant  
43 reduction in the average numbers of follicles per hair follicle group as compared to  
44 domestic shorthair cats, a mild to severe perifollicular to mural lymphocytic infiltration in  
45 77% of observed hair follicle groups, and the follicles are often miniaturized, dilated, and  
46 dysplastic. Whole genome sequencing was conducted on a single lykoi cat that was a  
47 cross between two independently ascertained lineages. Comparison to the 99 Lives  
48 dataset of 194 non-lykoi cats suggested two variants in the cat homolog for *Hairless*  
49 (*HR*: lysine demethylase and nuclear receptor corepressor) as candidate causal  
50 variants. The lykoi cat was a compound heterozygote for two loss of function variants in  
51 *HR*, an exon 3 c.1255\_1256dupGT (chrB1:36040783), which should produce a stop  
52 codon at amino acid 420 (p.Gln420Serfs\*100) and, an exon 18 c.3389insGACA  
53 (chrB1:36051555), which should produce a stop codon at amino acid position 1130  
54 (p.Ser1130Argfs\*29). Ascertainment of 14 additional cats from founder lineages from  
55 Canada, France and different areas of the USA identified four additional loss of function  
56 *HR* variants likely causing the highly similar phenotypic hair coat across the diverse  
57 cats. The novel variants in *HR* for cat hypotrichia can now be established between  
58 minor differences in the phenotypic presentations.

## 59 1. Introduction

60

61 Domestic cats have been developed into distinctive breeds during the past  
62 approximately 150 years, since the first cat shows held in the late 1800's [1-3]. Many  
63 breeds have proven to be genetically distinct [4,5] but also suffer from inbreeding and  
64 founder effects, inadvertently becoming important biomedical models for human  
65 diseases. Over 72 diseases / traits caused by at least 115 mutations have been  
66 discovered in cat breeds (<https://omia.org/>) [6,7]. To produce novel breeds, cats have  
67 been selected mainly for aesthetic, dermatological traits since the phenotypes can be  
68 easily recognized by cat enthusiasts, the unique appearance leading to a new breeding  
69 program. A majority of breeds were developed after the World Wars and several are  
70 defined by interesting coat DNA variants, such as the Cornish rex [8], Devon rex,  
71 sphynx [9], and the Selkirk rex [10,11]. These coat mutations are innocuous in the cat,  
72 but the same genes for atrichia and hypotrichia cause ectodermal dysplasias in humans  
73 [12-15] and other species [16-22]. However, some cat coat and fur types are associated  
74 with maladies. The *FOXN1* variant that causes a hypotrichosis in cats is associated with  
75 a health condition and shortened life expectancy in the Birman breed [23]. The *White*  
76 locus variant in *KIT* has pleiotropic effects in ocular tissues and is associated with  
77 deafness [24]. Albinism and temperature-sensitive variants in *tyrosinase (TYR)* [25,26],  
78 the *Color* locus in cats, are associated with disruption of the optical chiasma, leading to  
79 strabismus and nystagmus [27]. But overall, a majority of cat fur types and coat colors  
80 have few detrimental health effects.

81 A recently developed breed of cat, termed the lykoi (**Figure 1**), presents a unique form  
82 of hypotrichia [28]. Lykoi have a significant reduction in the average numbers of follicles  
83 per hair follicle group as compared to domestic shorthair cats, a mild to severe  
84 perifollicular to mural lymphocytic infiltration in 77% of observed hair follicle groups, and  
85 the follicles are often miniaturized, dilated, and dysplastic. Individual hairs of the coat  
86 are either normal coloration or all white, producing a roaning effect. The undercoats are  
87 sparse. The lykoi has been genotyped for all the known cat fur type mutations, including  
88 variants in *KRT71*, which cause the hairless sphynx breed, Devon rex [9] and Selkirk  
89 rex [11] curly hair, and none of these variants are present in the lykoi cats. The breeding  
90 program was established in 2011 by a veterinarian, who has constantly monitored  
91 health in the cats [29]. No health concerns have been identified in the lykoi other than  
92 the lymphocytic mural folliculitis.

93 Whole genome sequencing (WGS) has proven a successful genetic approach for the  
94 identification of causal variants for several phenotypes and diseases in the domestic cat  
95 [30-33]. This study used WGS to identify the causal variant(s) for the lykoi presentation  
96 in the domestic cats.

97

## 98 **2. Materials and methods**

99

### 100 *2.1. Ethics statement*

101 All procedures performed in studies involving animals were in accordance with the  
102 ethical standards of the University of Missouri (MU) institutional animal care and use  
103 protocol 8701 and 8313. All samples were collected with informed owner consent.

104

## 105 *2.2 Lykoi samples*

106 Samples for DNA isolation from the lykoi cats were provided voluntarily with the  
107 permission of the owners as either whole blood EDTA or buccal swabs. DNA was  
108 isolated by organic methods [34] or using DNAeasy kits (Qiagen, Valencia, CA)  
109 according to the manufacturer's protocol. To develop pedigrees, the breeder/owner  
110 reported parentage of submitted cats, parentage was verified with a panel of feline-  
111 derived short tandem repeats (STRs) as previously described [35]. STR fragment sizes  
112 were determined using STRand analysis software [36]. Samples from unrelated cats  
113 with similar phenotypes were also ascertained (**Table 1**).

114

## 115 *2.3 Whole genome sequencing and variant calling*

116 A single lykoi cat was whole genome sequenced as previously described [32]. The  
117 selected cat was an F1 from the mating of two independently discovered foundation  
118 lineages from Virginia and Tennessee. The sequence was included in the 195 - cat  
119 analysis of the 99 Lives cat genome sequencing project and submitted to the NCBI  
120 short read archive under BioProject: PRJNA308208, PRJNA288177; BioSample:  
121 SAMN05980355. For the 195 - cat analysis, reads were mapped to *Felis\_catus\_9.0* [37]  
122 and assigned to read groups using BWA-MEM from Burrows-Wheeler Aligner version  
123 0.7.17 [38]. Duplicate reads were marked using MarkDuplicates from Picard tools  
124 version 2.1.1 (<http://broadinstitute.github.io/picard/>), with  
125 OPTICAL\_DUPLICATE\_PIXEL\_DISTANCE set at 2500. Genome Analysis Toolkit  
126 version 3.8 (GATK 3.8) was used to further process the sequence data [39]. Indel

127 realignment was performed with RealignerTargetCreator and IndelRealigner [39] and  
128 SNPs, and Indels were called using HaplotypeCaller in gVCF mode (-ERC GVCF) [40].  
129 The gVCFs were combined into groups of ~20 individuals using CombineGVCFs and  
130 were genotyped simultaneously using GenotypeGVCFs. Throughout, Samtools version  
131 1.7 sort, index, view, and cat functions were used to process BAM files between  
132 individual tasks [41]. Together these processes produced a single VCF comprised of  
133 195 cats for downstream analysis. Code used to process individual genomes is publicly  
134 available on github ([https://github.com/mu-feline-genome/github-](https://github.com/mu-feline-genome/github-lewis/blob/master/map_libraries.slurm.sh)  
135 [lewis/blob/master/map\\_libraries.slurm.sh](https://github.com/mu-feline-genome/github-lewis/blob/master/map_libraries.slurm.sh)). DNA variants were viewed, filtered and  
136 annotated using VarSeq (Golden Helix, Boseman, MT) with the Ensembl release 98  
137 *Felis\_catus\_9.0* genome annotation [42]. Candidate variants were considered to be  
138 homozygous or compound heterozygous in the same gene in the Lykoi cat and not  
139 present in any other cat of the 99 Lives cat database. Only variants that caused high to  
140 moderate severity effects on the protein were considered and variants with high severity  
141 and within candidate genes were prioritized. Sequencing primers were developed for  
142 candidate variants as previously described [9] for the homolog of *HR* using sequences  
143 NCBI Accessions: XM\_023252512.1, XM\_011281452.3 (**Supplementary Table 1**).

144

#### 145 *2.4 Hairless (HR) genotyping and sequencing*

146 The two *HR* frameshift variants, including an exon 3 c.1255\_1256dupGT, and the exon  
147 18 c.3389insGACA, were identified by the WGS analyses. These variants were  
148 validated in the WGS cat by Sanger sequencing (**Supplementary Table 1**). An assay  
149 was designed as previously described [32] to genotype the identified variants in

150 pedigree A (**Supplementary Figure 1**) and the additional cats, using the Agena  
151 Bioscience iPLEX Gold Genotyping reagent set (Agena Bioscience Inc., San Diego, CA)  
152 (**Supplementary Table 2**). Products were genotyped with the MassARRAY System  
153 with Nanodispenser RS1000 (Agena Bioscience Inc., San Diego, CA).  
154 Not all ascertained cats with similar hair coats had the WGS identified variants,  
155 therefore the coding regions of *HR* were Sanger sequenced in each additional founder  
156 cat (**Supplementary Table 1**). PCR and thermocycling conditions were conducted as  
157 previously described [43]. The variants for the cats in the pedigree B (**Supplementary**  
158 **Figure 2**) were also genotyped by Sanger sequencing.

159

### 160 **3. Results**

161

#### 162 *3.1 Lykoi samples*

163 Over 100 cats were ascertained for the lykoi project and were used to develop two  
164 pedigrees of the cats segregating for the lykoi phenotype (**Supplementary Figures 1**  
165 **and 2**). The relationship of the cats was confirmed by STRs (data not shown). Sixty-  
166 seven cats formed an extended pedigree “A” by crossing three different lineages  
167 (Tennessee, Virginia and Texas) (**Supplementary Figure 1**) and a smaller pedigree “B”  
168 was obtained from a French lineage of cats (**Supplementary Figure 2**). Overall, cats  
169 were identified from 16 foundation lines, ascertained from 14 diverse regions in the  
170 USA, Canada and France. Two supposed founder lineages were independently  
171 ascertained from Florida, California and France, each (**Table 1, Figure 1**).

172



### 173 3.2 Whole genome sequencing

174 The selected cat for the WGS represented two founder lineages (**Supplementary**  
175 **Figure 1**) and a mean of 48.4x genomic sequence coverage was produced for the  
176 sequenced cat. Approximately 558 variants were identified as heterozygous in the lykoi  
177 cat. Seventeen were loss of function variants and 154 were missense variants (**Table 2,**  
178 **Supplementary File 1**). Only one gene was identified with variants that caused highly  
179 severe effects on the protein. The two variants in the cat homolog of *Hairless* (*HR*),  
180 *lysine demethylase and nuclear receptor corepressor* (cat chromosome B1:36,038,754  
181 – 36,052,521), were considered the highest priorities as both variants have severe  
182 effects and supported the suspected compound heterozygosity in the sequenced lykoi  
183 cat. Additionally, *HR* is a known gene causing atrichia in mice [44] and humans [45].  
184 The lykoi cat was a compound heterozygote for two loss of function variants in *HR*  
185 transcript (HR-202 ENSFCAT00000012982.5); specifically, an exon 3  
186 c.1255\_1256dupGT (chrB1:36040784), which should produce a stop codon at amino  
187 acid 420 (p.Gln420Serfs\*100) in the Tennessee lineage and is designated *hr<sup>TN</sup>* allele  
188 and, an exon 18 c.3389insGACA (chrB1:36051556), which should produce a stop  
189 codon at amino acid position 1130 (p.Ser1130Argfs\*29) in the Virginia lineage and is  
190 designated *hr<sup>VA</sup>* allele (**Figure 2**). These two identified frameshift variants were  
191 confirmed by direct Sanger sequencing in the cat submitted for WGS and the presented  
192 positions are for the newest cat genome assembly *Felis\_Catus\_9.0*  
193 (GCF\_000181335.3/). The lykoi phenotype segregated concordantly with each loss of  
194 function variant across the pedigree developed from the Virginia and Tennessee  
195 lineages (**Supplementary Figure 1**). Cats with the lykoi hair coat in these lineages

196 were either homozygous for one of the two loss of function variants or compound  
197 heterozygous for both loss of function variants.

198 WGS data also revealed additional *HR* variants. There was one synonymous variant  
199 (p.Val1129=), two missense variants (p.Lys433Asn and p.Ser1130Arg), 14 intronic  
200 variants, and one 3' UTR variant. One of the missense variants was an exon 3  
201 c.1299A>C, suggesting a p.Lys433Asn amino acid change of a positively charged lysine  
202 to a polar and uncharged asparagine. The p.Lys433Asn was a common variant with an  
203 allele frequency of 0.57. Conversely, the p.Ser1130Arg variant was heterozygous in  
204 only one other cat in the 99 Lives dataset (**Table 2, Supplementary File 2**).  
205 Heterozygous only splice region variants were identified in the 99 Lives dataset that  
206 appeared to be derived from Bengal cats, hence perhaps of Asian Leopard cat  
207 (*Prionailurus bengalensis*) origin.

208

### 209 *3.3 Lykoi variants in other lineages*

210 The *HR* variants discovered using WGS (c.1255\_1256dupGT and c.3389insGACA)  
211 were absent from other lykoi cats from different lineages, suggesting multiple causative  
212 variants for the phenotype. To identify additional lykoi variants, direct sequencing of the  
213 coding region of *HR* was performed on lineage founders. Four additional variants were  
214 identified (**Figure 2, Table 1**). Firstly, an exon 3 splice variant c.1404+2delTinsGT  
215 (chrB1:36040933) was identified in a cat from France Pedigree B and is designated *hr<sup>Fr</sup>*  
216 allele (**Figure 2, Supplementary Figure 2**). This variant should extend and change the  
217 reading frame, including an additional 24 amino acids in the aberrant protein before a  
218 stop codon is recognized. Alternatively, a cryptic splice site may be used from within

219 intron 4. Secondly, an exon 8 variant at c.2112G>A (chrB1:36045776) was identified in  
220 seven different lineages as homozygous, including a cat from France and is  
221 heterozygous in a suspected obligate carrier from Florida. This variant likely disrupts the  
222 splice donor allowing read through for an additional 12 amino acids until a stop codon is  
223 encountered and is designated  $hr^{TX}$  allele. Alternatively, a cryptic splice site may be  
224 used from within intron 8. Finally, two additional stop codon producing variants were  
225 also identified including an exon 10 c.2243C>T (p.Arg748X) (chrB1:36047047) in a cat  
226 from North Carolina, designated  $hr^{NC}$  allele, and an exon 11 c.2593C>T (p. Gln865X)  
227 (chrB1:36047518) identified in two cats from Tennessee and Canada and is designated  
228  $hr^{Ca}$  allele. Five submitted founder cats had unique variants. The founder cat from  
229 Canada had the same variant as one of the submitted founders from Florida. The other  
230 cat from Florida had a normal coat but was the offspring of a suspected new lineage.  
231 This cat was heterozygous for the exon 8 splice site variant thus, the queen did not  
232 have a novel variant. Overall, six likely causal variants were identified (**Figure 2**) in 16  
233 lineages, including seven lineages from the USA covering 11 states and one cat from  
234 France sharing the same exon 8 splice site variant. The variants, positions and flanking  
235 sequences are presented in **Supplementary File 3**.

236 Known crosses of the different foundation lineages supported the causal function of the  
237 identified variants. Sixteen cross lineage cats that had the lykoi hair coat were  
238 compound heterozygotes, including 16 for the  $hr^{TN}/hr^{VA}$  alleles (**Supplementary Figure**  
239 **1**) and compound heterozygous lykoi cats with the  $hr^{TX}/hr^{VA}$  alleles in both pedigrees  
240 (**Supplementary Figure 1, 2**). One of the seven cats with the exon 3 c.1299A>C non-  
241 synonymous variant was also homozygous for the exon 10 c.2243C>T (p.Arg748X) stop

242 codon variant and one other cat was homozygous for the exon 8 splice variant, further  
243 suggesting this missense variant as non-causal. The cats from France had been cross  
244 bred with cats from Italy and the USA, demonstrating the presence of the exon 8 and  
245 exon 18 variants. The French pedigree (Pedigree B – **Supplementary Figure 2**) also  
246 segregated for a novel exon 3 splice variant, indicating a novel *de novo* variant from  
247 Europe.  
248

#### 249 **4. Discussion**

250

251 Although over 50 cat breeds are identified by different cat associations and registries  
252 worldwide, fewer than 30 are demonstrated to be genetically distinct [4,5,46]. Novel cat  
253 breeds are continually being developed by producing a new breed from crosses with  
254 existing breeds, such as the Ocicat and Burmilla, by interbreeding domestic cats with  
255 small wild felids, such as Bengals and Savannahs, and by identifying new phenotypic  
256 variants in feral populations i.e., novelty selection, such as Devon [47], Cornish [48] and  
257 Selkirk rex [10]. Novelty breeds, such as Selkirk rex and Scottish folds, are  
258 characterized by novel “breed-defining” variants, retain high genetic variation [4,5,10],  
259 but often modify their type but by cross - breeding with established breeds that have the  
260 desired structural “look”. For example, the Selkirk rex has strong genetic influences from  
261 Persians and British shorthair [10], although the curly coat is a novelty phenotype  
262 identified in the past few decades in Northwestern USA [10].

263 The lykoi is a very recently developed novelty breed with a sparse hair coat and black  
264 and white hair roaning, hence named from the Greek term *lycos* for wolf. To maintain  
265 diversity in the founding population, the breeders have actively recruited cats with  
266 similar phenotypes for the breeding program, resulting in six different “foundation”  
267 lineages identified in this study from 16 potential founders. The breed is growing in  
268 popularity due to the novelty of the appearance, the lack of concern for health problems  
269 and the charismatic name and nature. The breed was accepted for full championship  
270 showing by TICA in May 2017 [29].

271 *Hairless (Hr)* (a.k.a. *lysine demethylase and nuclear receptor corepressor*) is one of the  
272 earliest mutations identified in mice (MMu Chr14:70554056-70573548) and over 30  
273 phenotypic mutations have been identified, including ~ 17 that are spontaneous,  
274 naturally occurring (MGD) [49]. The hairless mouse [50] is an insertion of murine  
275 leukemia proviral sequences into intron 6 resulting in aberrant splicing [51]. The *HR*  
276 gene encodes a protein that is involved in hair growth. This protein functions as a  
277 transcriptional corepressor of multiple nuclear receptors, including thyroid hormone  
278 receptor [52], the retinoic acid receptor-related orphan receptors [53] and the vitamin D  
279 receptors [54], and also interacts with histone deacetylases [55]. By modulating the  
280 activity of receptors, *HR* plays a critical role in skin function and hair maintenance by  
281 regulating both gene expression as well as epithelial stem cells differentiation. The  
282 translation of this protein is modulated by a regulatory ORF that exists upstream of the  
283 primary ORF, hence, the protein expression regulation is an overall critical element in  
284 directing hair growth [56]. The human homolog, *HR*, is on human chromosome 8p21.3;  
285 chr8:22114419-22131053. ClinVar lists 187 variants involving *HR*, 117 are limited to the  
286 gene and 17 are pathogenic or likely pathogenic mutations in humans [57]. Several *HR*  
287 variants are known to cause abnormalities in humans, such as alopecia universalis  
288 congenita (OMIM:203655) [52], atrichia with papular lesions (OMIM:209500) [58], which  
289 is an alopecia characterized by irreversible hair loss during the neonatal period on all  
290 hair-bearing areas of the body followed by the development of papular lesions, and  
291 Hypotrichosis 4, (a.k.a.) Marie Unna Type, 1; (OMIM:146550) , which is caused by  
292 autosomal dominant mutations in the upstream ORF – U2RH [56]. Variants in *HR* in  
293 other species are relatively rare, but causal variants of hairless are known in sheep [17],

294 atrichia with papular lesions is also identified in macaques [16], and, in dolphins,  
295 evolutionary loss has led to *HR* as a pseudogene, leading to hypotrichosis in this  
296 mammal [20]. Various other genes cause the hairless phenotypes, such as, *KRT71* in  
297 the sphynx breed [9], and *FOXI3* [19] and *SGK3* [59,60] in dogs.

298 *HR* in the cat is annotated in Ensembl 98 [61] as ENSFCAG00000012978  
299 B1:36034352-36051895:1. Three transcripts are described containing 17 – 19 exons, in  
300 which exons 17 – 19 are the variable exons. Three 5' UTRs are recognized, one as part  
301 of the 5' portion of exon 1. Two transcripts have short 3'UTRs at the end of exon 18.  
302 The variants in this study were annotated with Ensembl 98 transcript HR-202 containing  
303 4227 bp that translate to 1184 amino acids. Each of the six variants identified in the  
304 lykoi cats either cause termination codons at the variant site or cause downstream  
305 terminations after an additional 12 (exon 8 c.2112G>A) to 100 (exon 3  
306 c.1255\_1256dupGT) amino acids, leading to proteins with ~528 – 704+12 amino acids.  
307 Interestingly, one variant, exon 18 c.3389insGACA (p.Ser1130Argfs\*29), while  
308 associated with the phenotype, produces an almost full length protein (95%), suggesting  
309 the terminal end of the protein is required for normal function.

310 Several phenotypic traits in cats are heterogeneous, including the variants for the loci  
311 *Long*, *Tailless*, and the classic (blotched) pattern of *Tabby*, which are each caused by  
312 four different mutations in the genes *FGF5* [62,63], *TBX1* [64], and *LVRN* [65],  
313 respectively. Variation in the phenotypic presentations caused by these different  
314 variants is undocumented. Only the *TBX1* variants define breeds, the Manx and Cymric,  
315 which is a longhaired Manx, the *Long* and *Tabby* variants segregate within and amongst  
316 breeds. A few breeds have unique and breed defining variants, such as Scottish folds

317 [66], Selkirk rex [11], Devon rex, and sphynx [9]. Like the Manx, the lykoi will be a  
318 unique breed that segregates for several variants within the same gene, *HR*, that  
319 present a similar phenotype (**Figure 1**). Unlike the Manx variants [64], the variants that  
320 cause the hypotrichosis are recessive and do not cause additional health concerns  
321 known to date. The only documented abnormality is the sparse haircoat resulting from  
322 abnormal follicular development and lymphocytic mural folliculitis. Some variants are not  
323 perpetuated as they tend to cause more periodic hair loss, suspected to be associated  
324 with sex hormone levels (JRG, personal communication). The lykoi breeders can now  
325 use genetic testing to monitor the variants in the population and to realize possible  
326 associations with phenotypic differences in compound heterozygotes. Additional  
327 haplotype analyses of flanking variants could determine if the eight reported founder  
328 lineages with the exon 8 variant are identical by descent or identical by state and  
329 represent multiple *de novo* mutation events at the same site.

330



331 **Authors' contributions**

332 Reuben M. Buckley, Barbara Gandolfi, Erica K. Creighton, Connor A. Pyne, Michelle L.

333 LeRoy, David A. Senter, Delia M. Bouhan, Johnny R. Gobble, Marie Abitbol, Leslie A.

334 Lyons<sup>1</sup>

335

336 • Conception and design – LAL, JRG, BG

337 • Provision of study materials – LAL, JRG, BG, MLL, DAS, MA

338 • Collection and assembly of data – LAL, EKC, CAP, JRG, DMB

339 • Analysis and interpretation of the data – LAL, BG, RMB, MA

340 • Drafting of the article – LAL, BG

341 • Obtaining of funding – LAL

342 • Critical revision of the article for important intellectual content – LAL, BG, RMB, EKC

343 JRG, MA

344 • Final approval of the article – all authors

345

346 **Compliance with ethical standards**

347 **Competing interests** The authors declare that they have no competing interests.

348 **Ethical approval** All procedures performed in studies involving animals were in

349 accordance with the ethical standards of the University of Missouri institutional animal

350 care and use protocol 8701 and 8313.

351

352

353 References

354

- 355 1. Crystal Palace - Summer concert today Cat Show on July 13. *Penny Illustrated*  
356 *Paper, Amusement: 1871, 510, July 08, 11.*
- 357 2. The First Cat Show in America. *New York Times* March 06, 1881.
- 358 3. Morris, D. *Cat breeds of the world*; Penguin Books: New York, 1999.
- 359 4. Lipinski, M.J.; Froenicke, L.; Baysac, K.C.; Billings, N.C.; Leutenegger, C.M.; Levy,  
360 A.M.; Longeri, M.; Niini, T.; Ozpinar, H.; Slater, M.R., et al. The ascent of cat  
361 breeds: genetic evaluations of breeds and worldwide random-bred populations.  
362 *Genomics* **2008**, *91*, 12-21, doi:10.1016/j.ygeno.2007.10.009.
- 363 5. Kurushima, J.D.; Lipinski, M.J.; Gandolfi, B.; Froenicke, L.; Grahn, J.C.; Grahn,  
364 R.A.; Lyons, L.A. Variation of cats under domestication: genetic assignment of  
365 domestic cats to breeds and worldwide random-bred populations. *Anim Genet* **2013**,  
366 *44*, 311-324, doi:10.1111/age.12008.
- 367 6. Online Mendelian Inheritance in Animals, OMIA. Available online: <https://omia.org/>  
368 (accessed on 28 Apr 2017).
- 369 7. Lenffer, J.; Nicholas, F.W.; Castle, K.; Rao, A.; Gregory, S.; Poidinger, M.; Mailman,  
370 M.D. OMIA (Online Mendelian Inheritance in Animals): an enhanced platform and  
371 integration into the Entrez search interface at NCBI. *Nucleic Acids Res* **2006**, *34*,  
372 D599-D601, doi:10.1093/nar/gkj152.
- 373 8. Gandolfi, B.; Alhaddad, H.; Affolter, V.K.; Brockman, J.; Haggstrom, J.; Joslin,  
374 S.E.K.; Koehne, A.L.; Mullikin, J.C.; Outerbridge, C.A.; Warren, W.C., et al. To the  
375 root of the curl: a signature of a recent selective sweep identifies a mutation that  
376 defines the Cornish rex cat breed. *PLoS One* **2013**, *8*,  
377 doi:10.1371/journal.pone.0067105.
- 378 9. Gandolfi, B.; Outerbridge, C.A.; Beresford, L.G.; Myers, J.A.; Pimentel, M.;  
379 Alhaddad, H.; Grahn, J.C.; Grahn, R.A.; Lyons, L.A. The naked truth: sphynx and  
380 Devon rex cat breed mutations in *KRT71*. *Mamm Genome* **2010**, *21*, 509-515,  
381 doi:10.1007/s00335-010-9290-6.
- 382 10. Filler, S.; Alhaddad, H.; Gandolfi, B.; Kurushima, J.D.; Cortes, A.; Veit, C.; Lyons,  
383 L.A.; Brem, G. Selkirk rex: morphological and genetic characterization of a new cat  
384 breed. *J Hered* **2012**, *103*, 727-733, doi:10.1093/jhered/ess039.
- 385 11. Gandolfi, B.; Alhaddad, H.; Joslin, S.E.K.; Khan, R.; Filler, S.; Brem, G.; Lyons, L.A.  
386 A splice variant in *KRT71* is associated with curly coat phenotype of Selkirk rex  
387 cats. *Sci Rep* **2013**, *3*, doi:10.1038/Srep02000.
- 388 12. Irvine, A.D.; McLean, W.H. Human keratin diseases: the increasing spectrum of  
389 disease and subtlety of the phenotype-genotype correlation. *Br J Dermatol* **1999**,  
390 *140*, 815-828, doi:10.1046/j.1365-2133.1999.02810.x.
- 391 13. Smith, F.J.D. The molecular genetics of keratin disorders. *Am J Clin Dermatol* **2003**,  
392 *4*, 347-364, doi:10.2165/00128071-200304050-00005.
- 393 14. Visinoni, A.F.; Lisboa-Costa, T.; Pagnan, N.A.B.; Chautard-Freire-Maia, E.A.  
394 Ectodermal dysplasias: clinical and molecular review. *Am J Med Genet* **2009**, *149A*,  
395 1980-2002, doi:10.1002/ajmg.a.32864.

- 396 15. Wright, J.T.; Fete, M.; Schenider, H.; Zinser, M.; Koster, M.I.; Clarke, A.J.; Hadj-  
397 Rabia, S.; Tadini, G.; Pagnan, N.; Visinoni, A.F., et al. Ectodermal dysplasias:  
398 classification and organization by phenotype, genotype and molecular pathway. *Am*  
399 *J Med Genet* **2019**, *179*, 442-447, doi:10.1002/ajmg.a.61045.
- 400 16. Ahmad, W.; Ratterree, M.S.; Panteleyev, A.A.; Aita, V.M.; Sundberg, J.P.;  
401 Christiano, A.M. Atrichia with papular lesions resulting from mutations in the rhesus  
402 macaque (*Macaca mulatta*) hairless gene. *Lab Anim* **2002**, *36*, 61-67,  
403 doi:10.1258/0023677021911777.
- 404 17. Finocchiaro, R.; Portolan, B.; Damiani, G.; Caroli, A.; Budelli, E.; Bolla, P.;  
405 Pagnacco, G. The hairless (*hr*) gene is involved in the congenital hypotrichosis of  
406 Valle del Belice sheep. *Genet Sel Evol* **2003**, *35*, S147-S156,  
407 doi:10.1051/gse:2003023.
- 408 18. Barlund, C.S.; Clark, E.G.; Leeb, T.; Drogemuller, C.; Palmer, C.W. Congenital  
409 hypotrichosis and partial anodontia in a crossbreed beef calf. *Can Vet J* **2007**, *48*,  
410 612-614.
- 411 19. Drogemuller, C.; Karlsson, E.K.; Hytonen, M.K.; Perloski, M.; Dolf, G.; Saino, K.;  
412 Lohi, H.; Lindblad-Toh, K.; Leeb, T. A mutation in hairless dogs implicates *FOXI3* in  
413 ectodermal development. *Science* **2008**, *321*, 1462, doi:10.1126/science.1162525.
- 414 20. Chen, Z.; Wang, Z.; Xu, S.; K., Z.; G., Y. Characterization of hairless (*Hr*) and *FGF5*  
415 genes provides insights into the molecular basis of hair loss in cetaceans. *BMC Evol*  
416 *Biol* **2013**, *13*, 34, doi:10.1186/1471-2148-13-34.
- 417 21. Parker, H.G.; Harris, A.; Dreger, D.L.; Davis, B.W.; Ostrander, E.A. The bald and  
418 the beautiful: hairlessness in domestic dog breeds. *Phil Trans R Soc B* **2017**, *372*,  
419 20150488, doi:10.1098/rstb.2015.0488.
- 420 22. Hadji-Rasouliha, S.; Bauer, A.; Dettwiler, M.; Welle, M.M.; Leeb, T. A frameshift  
421 variant in the *EDA* gene in dachshunds with X-linked hypohidrotic ectodermal  
422 dysplasia. *Anim Genet* **2018**, *49*, 651-654, doi:10.1111/age.12729.
- 423 23. Abitbol, M.; Bosse, P.; Thomas, A.; Tiret, L. A deletion in *FOXN1* is associated with  
424 a syndrome characterized by congenital hypotrichosis and short life expectancy in  
425 Birman cats. *PLoS One* **2015**, *10*, e0120668, doi:10.1371/journal.pone.0120668.
- 426 24. David, V.A.; Menotti-Raymond, M.; Wallace, A.C.; Roelke, M.; Leighty, R.; Eizirik,  
427 E.; Hannah, S.S.; Nelson, G.; Schäffer, A.A.; Connelly, C.J., et al. Endogenous  
428 retrovirus insertion in the *KIT* oncogene determines white and white spotting in  
429 domestic cats. *G3* **2014**, *4*, 1881-1891, doi:10.1534/g3.114.013425.
- 430 25. Lyons, L.A.; Imes, D.I.; Rah, H.C.; Grahn, R.A. Tyrosinase mutations associated  
431 with Siamese and Burmese patterns in the domestic cat (*Felis catus*). *Anim Genet*  
432 **2005**, *36*, 119-126, doi:10.1111/j.1365-2052.2005.01253.x.
- 433 26. Imes, D.I.; Geary, L.A.; Grahn, R.A.; Lyons, L.A. Albinism in the domestic cat (*Felis*  
434 *catus*) is associated with a tyrosinase (*TYR*) mutation. *Anim Genet* **2006**, *37*, 175-  
435 180, doi:10.1111/j.1365-2052.2005.01409.x.
- 436 27. Creel, D.; Hendrickson, A.E.; Leventhal, A.G. Retinal projections in tyrosinase-  
437 negative albino cats. *J Neurosci* **1982**, *2*, 907-911, doi:10.1523/JNEUROSCI.02-07-  
438 00907.1982.
- 439 28. LeRoy, M.L.; Senter, D.A.; Kim, D.Y.; Gandolfi, B.; Middleton, J.R.; Bouhan, D.M.;  
440 Lyons, L.A. Clinical and histologic description of lykoi cat hair coat and skin. *Jap J*  
441 *Vet Dermatol* **2016**, *22*, 179-191.

- 442 29. TICA. The International Cat Association. Available online: (accessed on 01 May  
443 2020).
- 444 30. Lyons, L.A.; Creighton, E.K.; Alhaddad, H.; Beale, H.C.; Grahn, R.A.; Rah, H.;  
445 Maggs, D.J.; Helps, C.R.; Gandolfi, B. Whole genome sequencing in cats, identifies  
446 new models for blindness in *AIP1* and somite segmentation in *HES7*. *BMC*  
447 *Genomics* **2016**, *17*, 265, doi:10.1186/s12864-016-2595-4.
- 448 31. Mauler, D.A.; Gandolfi, B.; Rineiro, C.R.; O'Brien, D.P.; Spooner, J.L.; Lyons, L.A.  
449 Precision medicine in cats: novel Niemann-Pick type C1 diagnosed by whole-  
450 genome sequencing. *J Vet Intern Med* **2017**, *31*, 539-544, doi:10.1111/jvim.14599.
- 451 32. Oh, A.; Pearce, J.W.; Gandolfi, B.; Creighton, E.K.; Suedmeyer, W.K.; Michael  
452 Selig, M.; Bosiack, A.P.; Castaner, L.J.; Whiting, R.E.H.; Belknap, E.B., et al. Early-  
453 Onset Progressive Retinal Atrophy Associated with an *IQCB1* Variant in African  
454 Black-Footed Cats (*Felis nigripes*). *Sci Rep* **2017**, 10.1038/srep43918,  
455 doi:10.1038/srep43918.
- 456 33. Buckley, R.M.; Grahn, R.A.; Gandolfi, B.; Herrick, J.R.; Kittleson, M.D.; Bateman,  
457 H.L.; Newsom, J.; Swanson, W.F.; Prieur, D.J.; Lyons, L.A. Assisted reproduction  
458 mediated resurrection of a feline model for Chediak-Higashi syndrome caused by a  
459 large duplication in *LYST*. *Sci Rep* **2020**, *10*, 64, doi:10.1038/s41598-019-56896-9.
- 460 34. Sambrook, J.; Russell, D.W. Preparation and analysis of eukaryotic genomic DNA.  
461 In *Molecular cloning: a laboratory manual*, 3rd ed.; Sambrook, J., Russell, D.W.,  
462 Eds. Cold Spring Laboratory Press: Cold Spring Harbor, New York, USA, 2001; pp.  
463 6.11-16.14.
- 464 35. Lipinski, M.J.; Amigues, Y.; Blasi, M.; Broad, T.E.; Cherbonnel, C.; Cho, G.J.;  
465 Corley, S.; Daftari, P.; Delattre, D.R.; Dileanis, S., et al. An international parentage  
466 and identification panel for the domestic cat (*Felis catus*). *Anim Genet* **2007**, *38*,  
467 371-377, doi:10.1111/j.1365-2052.2007.01632.x.
- 468 36. Toonen, R.J.; Hughes, S. Increased throughput for fragment analysis on an ABI  
469 Prism 377 automated sequencer using a membrane comb and STRand software.  
470 *BioTechniques* **2001**, *31*, 1320-1324.
- 471 37. Buckley, R.M.; Davis, B.W.; Brashear, W.A.; Farias, F.H.; Kuroki, K.; Graves, T.;  
472 Hillier, L.W.; Kremitzki, M.; Li, G.; Middleton, R. A new domestic cat genome  
473 assembly based on long sequence reads empowers feline genomic medicine and  
474 identifies a novel gene for dwarfism. *bioRxiv* **2020**, 896258.
- 475 38. Li, H. Aligning sequence reads, clone sequences and assembly contigs with BWA-  
476 MEM. *arXiv preprint arXiv:1303.3997*. **2013**.
- 477 39. McKenna, A.; Hanna, M.; Banks, E.; Sivachenko, A.; Cibulskis, K.; Kernytzky, A.;  
478 Garimella, K.; Altshuler, D.; Gabriel, S.; Daly, M., et al. The Genome Analysis  
479 Toolkit: a MapReduce framework for analyzing next-generation DNA sequencing  
480 data. *Genome Res* **2010**, *20*, 1297-1303, doi:10.1101/gr.107524.110.
- 481 40. Poplin, R.; Ruano-Rubio, V.; DePristo, M.; Fennell, T.; Carneiro, M.; Van der  
482 Auwera, G.; Kling, D.; Gauthier, L.; Levy-Moonshine, A.; Roazen, D. Scaling  
483 accurate genetic variant discovery to tens of thousands of samples. *bioRxiv* **2017**,  
484 201178.
- 485 41. Li, H.; Handsaker, B.; Wysoker, A.; Fennell, T.; Ruan, J.; Homer, N.; Marth, G.;  
486 Abecasis, G.; Durbin, R.; Genome Project Data Processing, S. The Sequence

- 487 Alignment/Map format and SAMtools. *Bioinformatics* **2009**, *25*, 2078-2079,  
488 doi:10.1093/bioinformatics/btp352.
- 489 42. Cunningham, F.; Achuthan, P.; Akanni, W.; Allen, J.; Amode, M.R.; Armean, I.M.;  
490 Bennett, R.; Bhai, J.; Billis, K.; Boddu, S., et al. Ensembl 2019. *Nucleic Acids Res*  
491 **2019**, *47*, D745-D751, doi:10.1093/nar/gky1113.
- 492 43. Gandolfi, B.; Daniel, R.J.; O'Brien, D.P.; Guo, L.T.; Youngs, M.D.; Leach, S.B.;  
493 Jones, B.R.; Shelton, G.D.; Lyons, L.A. A novel mutation in *CLCN1* associated with  
494 feline myotonia congenita. *PLoS One* **2014**, *9*, e109926,  
495 doi:10.1371/journal.pone.0109926.
- 496 44. Cachon-Gonzalez, M.B.; Fenner, S.; Coffin, J.M.; Moran, C.; Best, S.; Stoye, J.P.  
497 Structure and expression of the hairless gene of mice. *Proc Natl Acad Sci USA*  
498 **1994**, *91*, 7717-7721, doi:10.1073/pnas.91.16.7717.
- 499 45. Ahmad, W.; Faiyaz ul Haque, M.; Brancolini, V.; Tsou, H.C.; ul Haque, S.; Lam, H.;  
500 Aita, V.M.; Owen, J.; deBlaquiere, M.; Frank, J., et al. Alopecia universalis  
501 associated with a mutation in the human hairless gene. *Science* **1998**, *279*, 720-  
502 724, doi:10.1126/science.279.5351.720.
- 503 46. Menotti-Raymond, M.; David, V.A.; Weir, B.S.; O'Brien, S.J. A population genetic  
504 database of cat breeds developed in coordination with a domestic cat STR  
505 multiplex. *J Forensic Sci* **2012**, *57*, 596-601, doi:10.1111/j.1556-4029.2011.02040.x.
- 506 47. Robinson, R. Devon rex- a third rexoid coat mutation in the cat. *Genetica* **1969**, *40*,  
507 597-599, doi:10.1007/BF01787284.
- 508 48. Searle, A.G.; Jude, A.C. The 'rex' type coat in the domestic cat. *J Genet* **1956**, 506-  
509 512.
- 510 49. Bult, C.J.; Eppig, J.T.; Kadin, J.A.; Richardson, J.E.; Blake, J.A.; Group, M.G.D. The  
511 mouse genome database (MGD): mouse biology and model systems. *Nucleic Acids*  
512 *Res* **2008**, *36*, D724-D728, doi:10.1093/nar/gkm961.
- 513 50. Brooke, H.C. Hairless mice. *J Hered* **1926**, *17*, 173-174,  
514 doi:10.1093/oxfordjournals.jhered.a102700.
- 515 51. Ahmad, W.; Panteleyev, A.A.; Christiano, A.M. The molecular basis of congenial  
516 atrichia in humans and mice: mutations in the hairless gene. *J Investig Dermatol*  
517 *Symp Proc* **1999**, *4*, 240-243, doi:10.1038/sj.jidsp.5640220.
- 518 52. Klein, I.; Bergman, R.; Indelman, M.; Sprecher, E. A novel missense mutation  
519 affecting the human hairless thyroid receptor interacting domain 2 causes  
520 congenital atrichia. *J Investig Dermatol* **2002**, *119*, 920-922, doi:10.1046/j.1523-  
521 1747.2002.00268.x.
- 522 53. Moraitis, A.N.; Giguere, V. The co-repressor hairless protects ROR-alpha orphan  
523 nuclear receptor from proteasome mediated degradation. *J Biol Chem* **2003**, *278*,  
524 52511-52518, doi:10.1074/jbc.M308152200.
- 525 54. Hsieh, J.-C.; Sisk, J.M.; Jurutka, P.W.; Haussler, C.A.; Slater, S.A.; Haussler, M.R.;  
526 Thompson, C.C. Physical and functional interaction between the vitamin D receptor  
527 and hairless corepressor, two proteins required for hair cycling. *J Biol Chem* **2003**,  
528 *278*, 38665-38674, doi:10.1074/jbc.M304886200.
- 529 55. Potter, G.B.; Beaudoin III, G.M.J.; DeRenzo, C.L.; Zarach, J.M.; Chen, S.H.;  
530 Thompson, C.C. The *hairless* gene mutated in congenital hair loss disorders  
531 encodes a novel nuclear receptor corepressor. *Genes Dev* **2001**, *15*, 2687-2701,  
532 doi: 10.1101/gad.916701.

- 533 56. Wen, Y.; Liu, Y.; Xu, Y.; Zhou, Y.; Hua, R.; Wang, K.; Sun, M.; Li, Y.; Yang, S.;  
534 Zhang, X.-J., et al. Loss-of-function mutations of an inhibitory upstream ORF in the  
535 human hairless transcript cause Marie Unna hereditary hypotrichosis. *Nat Genet*  
536 **2009**, *41*, 228-233, doi:10.1038/ng.276.
- 537 57. Landrum, M.J.; Lee, J.M.; Benson, M.; Brown, G.R.; Chao, C.; Chitipiralla, S.; Gu,  
538 B.; Hart, J.; Hoffman, D.; Jang, W., et al. ClinVar: improving access to variant  
539 interpretations and supporting evidence. *Nucleic Acids Res* **2018**, *46*, D1062-  
540 D1076, doi:10.1093/nar/gkx1153.
- 541 58. Aita, V.M.; Ahmad, W.; Panteleyev, A.A.; Kozłowska, U.; Kozłowska, A.; Gilliam,  
542 T.C.; Jabłonska, S.; Christiano, A.M. A novel missense mutation (C622G) in the  
543 zinc-finger domain of the human hairless gene associated with congenital atrichia  
544 with papular lesions. *Experim Dermatol* **2001**, *9*, 157-162, doi:10.1034/j.1600-  
545 0625.2000.009002157.x.
- 546 59. Hytonen, M.K.; Lohi, H. A frameshift insertion in *SGK3* leads to recessive  
547 hairlessness in Scottish Deerhounds: a candidate gene for human alopecia  
548 conditions. *Human Genet* **2019**, *138*, 535-539, doi:10.1007/s00439-019-02005-9.
- 549 60. Parker, H.G.; Whitaker, D.T.; Harris, A.C.; Ostrander, E.A. Whole genome analysis  
550 of a single Scottish deerhound family provides independent corroboration that a  
551 *SGK3* coding variant leads to hairlessness. *G3* **2020**, *10*, 293-297,  
552 doi:10.1534/g3.119.400885.
- 553 61. Cunningham, F.; Achuthan, P.; Akanni, W.; Allen, J.; Amode, M R.; Armean, I.M.;  
554 Bennett, R.; Bhai, J.; Billis, K.; Boddu, S., et al. Ensembl 2019. *Nucleic Acids Res*  
555 **2018**, *47*, D745-D751, doi:10.1093/nar/gky1113.
- 556 62. Drogemuller, C.; Rufenacht, S.; Wichert, B.; Leeb, T. Mutations within the *FGF5*  
557 gene are associated with hair length in cats. *Anim Genet* **2007**, *38*, 218-221,  
558 doi:10.1111/j.1365-2052.2007.01590.x.
- 559 63. Kehler, J.S.; David, V.A.; Schaffer, A.A.; Bajema, K.; Eizirik, E.; Ryugo, D.K.;  
560 Hannah, S.S.; O'Brien, S.J.; Menotti-Raymond, M. Four independent mutations in  
561 the feline Fibroblast Growth Factor 5 gene determine the long-haired phenotype in  
562 domestic cats. *J Hered* **2007**, *98*, 555-566, doi:10.1093/jhered/esm072.
- 563 64. Buckingham, K.J.; McMillin, M.J.; Brassil, M.M.; Shively, K.M.; Magnaye, K.M.;  
564 Cortes, A.; Weinmann, A.S.; Lyons, L.A.; Bamshad, M.J. Multiple mutant *T* alleles  
565 cause haploinsufficiency of brachyury and short tails in Manx cats. *Mamm Genome*  
566 **2013**, *10.1007/s00335-013-9471-1*, doi:10.1007/s00335-013-9471-1.
- 567 65. Kaelin, C.B.; Xu, X.; Hong, L.Z.; David, V.A.; McGowan, K.A.; Schmidt-Kuntzel, A.;  
568 Roelke, M.E.; Pino, J.; Pontius, J.; Cooper, G.M., et al. Specifying and sustaining  
569 pigmentation patterns in domestic and wild cats. *Science* **2012**, *337*, 1536-1541,  
570 doi:10.1126/science.1220893.
- 571 66. Gandolfi, B.; Alamri, S.; Darby, W.G.; Adhikari, B.; Lattimer, J.C.; Malik, R.; Wade,  
572 C.M.; Lyons, L.A.; Cheng, J.; Bateman, J.F., et al. A dominant *TRPV4* variant  
573 underlies osteochondrodysplasia in Scottish fold cats. *Osteoarthritis Cartilage* **2016**,  
574 *24*, 1441-1450, doi:10.1016/j.joca.2016.03.019.
- 575 67. Menotti-Raymond, M.; David, V.A.; Stephens, J.C.; Lyons, L.A., O'Brien, S.J.  
576 Genetic individualization of domestic cats using feline STR loci for forensic  
577 applications. *J Forensic Sci* **1997**, *42*, 1039-1051, doi: 10.1520/JFS14258J.

- 578 68. Menotti-Raymond, M.; David, V.A.; Lyons, L.A.; Schaffer, A.A.; Tomlin, J.F.; Hutton,  
579 M.K.; O'Brien, S.J. A genetic linkage map of microsatellites in the domestic cat  
580 (*Felis catus*). *Genomics* **1999**, *57*, 9-23, doi: 10.1006/geno.1999.5743.  
581

582 **Table 1. Lykoi founder lineage variants in *Hairless (HR)* for cats with the hypotrichia presentation.**

|                              |          | <i>hr</i> <sup>TN</sup> | <i>hr</i> <sup>Fr</sup>    | <i>hr</i> <sup>TX</sup> | <i>hr</i> <sup>NC</sup> | <i>hr</i> <sup>Ca</sup> | <i>hr</i> <sup>VA</sup> | <b>HR Alleles<sup>‡</sup></b>                     |
|------------------------------|----------|-------------------------|----------------------------|-------------------------|-------------------------|-------------------------|-------------------------|---------------------------------------------------|
|                              |          | <b>Exon 3</b>           | <b>Exon 3</b>              | <b>Exon 8</b>           | <b>Exon 10</b>          | <b>Exon 11</b>          | <b>Exon 18</b>          |                                                   |
|                              |          | c.1255_1256<br>dupGT    | c.1404+<br>2delTins<br>CAG | c.2112G<br>>A           | c.2243<br>C>T           | c.2593<br>C>T           | c.3389ins<br>GACA       |                                                   |
| <b>Founder Lineage</b>       |          |                         |                            |                         |                         |                         |                         |                                                   |
| <b>WGS F1 TN/VA*</b>         | 19725    | <b>Wt/dup</b>           |                            | G/G                     | C/C                     | C/C                     | <b>Wt/ins</b>           | <i>hr</i> <sup>TN</sup> / <i>hr</i> <sup>VA</sup> |
| <b>Tennessee</b>             | 17604    | <b>dup/dup</b>          |                            | G/G                     | C/C                     | C/C                     | Wt/Wt                   | <i>hr</i> <sup>TN</sup> / <i>hr</i> <sup>TN</sup> |
| <b>Virginia</b>              | 17602-3  | Wt/Wt                   |                            | G/G                     | C/C                     | C/C                     | <b>ins/ins</b>          | <i>hr</i> <sup>VA</sup> / <i>hr</i> <sup>VA</sup> |
| <b>Missouri</b>              | 19726    | <b>dup/dup</b>          |                            | G/G                     |                         | C/C                     | Wt/Wt                   | <i>hr</i> <sup>TN</sup> / <i>hr</i> <sup>TN</sup> |
| <b>France L10, L4</b>        | 22301    | Wt/Wt                   | <b>CAG/CAG</b>             | G/G                     | C/C                     | C/C                     | Wt/Wt                   | <i>hr</i> <sup>Fr</sup> / <i>hr</i> <sup>Fr</sup> |
| <b>Texas</b>                 | 19727-8  | Wt/Wt                   |                            | <b>A/A</b>              |                         | C/C                     | Wt/Wt                   | <i>hr</i> <sup>TX</sup> / <i>hr</i> <sup>TX</sup> |
| <b>California 1</b>          | 22289-90 | Wt/Wt                   |                            | <b>A/A</b>              |                         | C/C                     | Wt/Wt                   | <i>hr</i> <sup>TX</sup> / <i>hr</i> <sup>TX</sup> |
| <b>California 2</b>          | 20914    | Wt/Wt                   |                            | <b>A/A</b>              | C/C                     | C/C                     | Wt/Wt                   | <i>hr</i> <sup>TX</sup> / <i>hr</i> <sup>TX</sup> |
| <b>France L12</b>            | 22303    | Wt/Wt                   |                            | <b>A/A</b>              | C/C                     | C/C                     | Wt/Wt                   | <i>hr</i> <sup>TX</sup> / <i>hr</i> <sup>TX</sup> |
| <b>Georgia</b>               | 21463    |                         |                            | <b>A/A</b>              |                         |                         |                         | <i>hr</i> <sup>TX</sup> / <i>hr</i> <sup>TX</sup> |
| <b>South Carolina</b>        | 19729    | Wt/Wt                   |                            | <b>A/A</b>              | C/C                     | C/C                     | Wt/Wt                   | <i>hr</i> <sup>TX</sup> / <i>hr</i> <sup>TX</sup> |
| <b>Utah</b>                  | 20912    | Wt/Wt                   |                            | <b>A/A</b>              |                         | C/C                     | Wt/Wt                   | <i>hr</i> <sup>TX</sup> / <i>hr</i> <sup>TX</sup> |
| <b>Vermont Gonzalo</b>       | 21224    | Wt/Wt                   | Wt/Wt                      | <b>A/A</b>              | C/C                     | C/C                     | Wt/Wt                   | <i>hr</i> <sup>TX</sup> / <i>hr</i> <sup>TX</sup> |
| <b>North Carolina</b>        | 22476    | Wt/Wt                   |                            | G/G                     | <b>T/T</b>              | C/C                     | Wt/Wt                   | <i>hr</i> <sup>NC</sup> / <i>hr</i> <sup>NC</sup> |
| <b>Canada</b>                | 20918    |                         |                            | G/G                     | C/C                     | <b>T/T</b>              | Wt/Wt                   | <i>hr</i> <sup>Ca</sup> / <i>hr</i> <sup>Ca</sup> |
| <b>Florida 1</b>             | 21132    | Wt/Wt                   |                            | G/G                     | C/C                     | <b>T/T</b>              | Wt/Wt                   | <i>hr</i> <sup>Ca</sup> / <i>hr</i> <sup>Ca</sup> |
| <b>Florida 2<sup>†</sup></b> | 19640    | Wt/Wt                   |                            | G/A                     | C/C                     | C/C                     | Wt/Wt                   | Wt/ <i>hr</i> <sup>TX</sup>                       |
| <b>Protein Change</b>        |          | <b>Q420S</b>            | <b>Splice</b>              | <b>Splice</b>           | <b>R748X</b>            | <b>Q865X</b>            | <b>S1130R</b>           |                                                   |

583 Bolded are the causal variant for each cat. \*Cat used for WGS was a cross of two lineages. †One cat had an unknown  
 584 phenotype but reported as an offspring from lykoi breedings for a new lineage. ‡Alleles named after the state or country of  
 585 the cat's origin in which they were first identified. NC is North Carolina USA, TN is Tennessee USA, TX is Texas USA, VA  
 586 is Virginia USA, Ca is Canada, Fr is France.



587 **Table 2. Unique 99 Lives heterozygous WGS variants in a lykoi cat.**

588

| Severity | Effect                      | No. | Genes            | HR  |
|----------|-----------------------------|-----|------------------|-----|
| High     | Frame Shift (LOF)           | 13  | 12*              | 2   |
|          | Splice donor - acceptor     | 0   | 0                | 0   |
|          | Stop gained (LOF)           | 4   | 5                | 0   |
| Moderate | Missense                    | 154 | 146              | 62  |
| Low      | Splice region               | 31  | 30               | 5   |
|          | Synonymous                  | 127 | 120 <sup>†</sup> | 67  |
| Other    | <b>Intronic</b>             | 118 | 103              | 9   |
|          | <b>Intergenic &amp; UTR</b> | 17  | --               | 7   |
|          | <b>Non-coding exon</b>      | 94  | 68               | 0   |
|          | <b>Total variants</b>       | 558 | ~426**           | 152 |

589 \*Two variants in *HR*, <sup>†</sup>including p.Ser1130Arg in *HR*. Three variants in *HR* were unique to the lykoi cat in the WGS  
 590 comparison to 193 additional cats. \*\*Total includes undefined transcripts and suspected coding sequences.

591

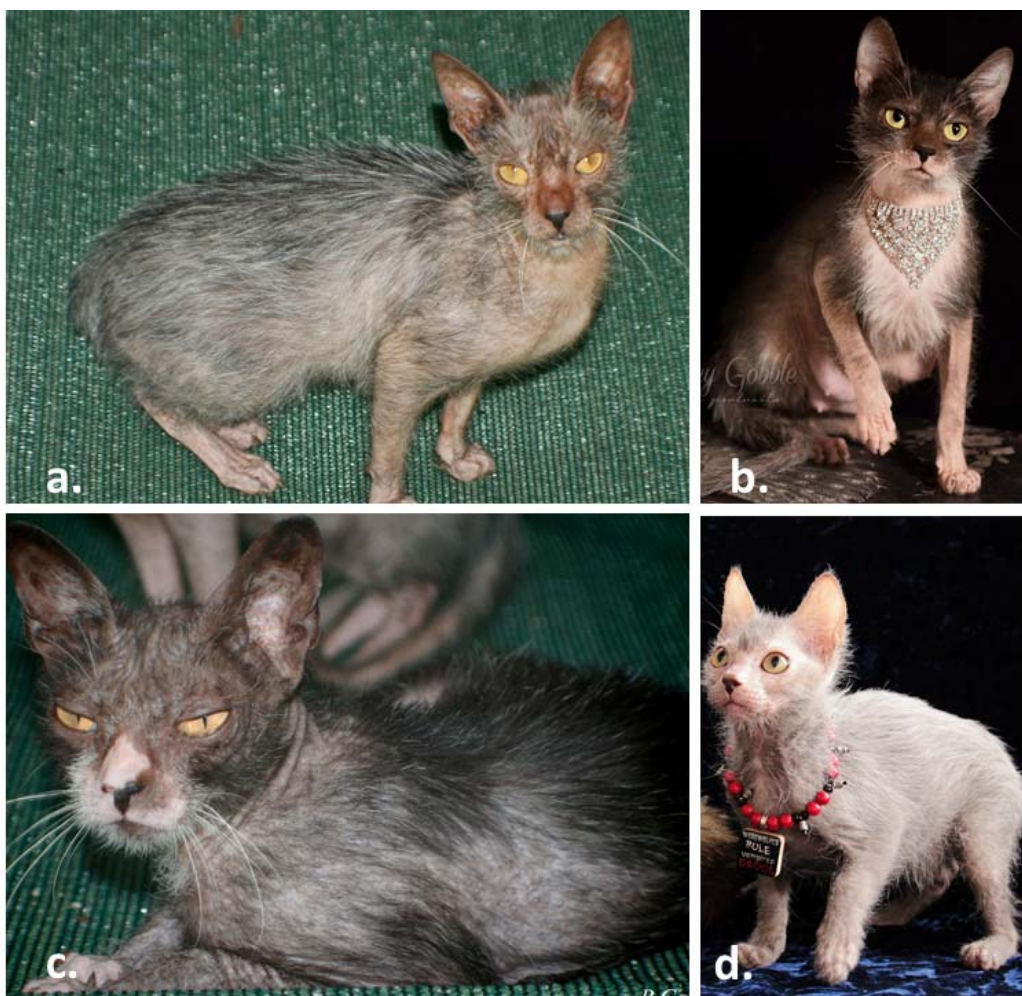

592

593

594

595

**Figure 1. The lykoi cat breed.** Lykoi breed founders from independent sightings identified in 2010. a.) Virginia lineage (c.3389insGACA), b.) Missouri lineage (c.1255\_1256 dupGT), c.) Tennessee lineage (c.1255\_1256dupGT), d.) Canadian lineage (c.2593C>T). Solid black is the preferred coloration as the roaning of the white hairs is more distinctive. Note

596 sparse hair on the lower limbs. (Images courtesy of Brittney Gobble). Sixteen different lineages were ascertained  
597 containing six different variants in *HR*. Cats can molt their hair coat at different times during development and through-out  
598 the year.

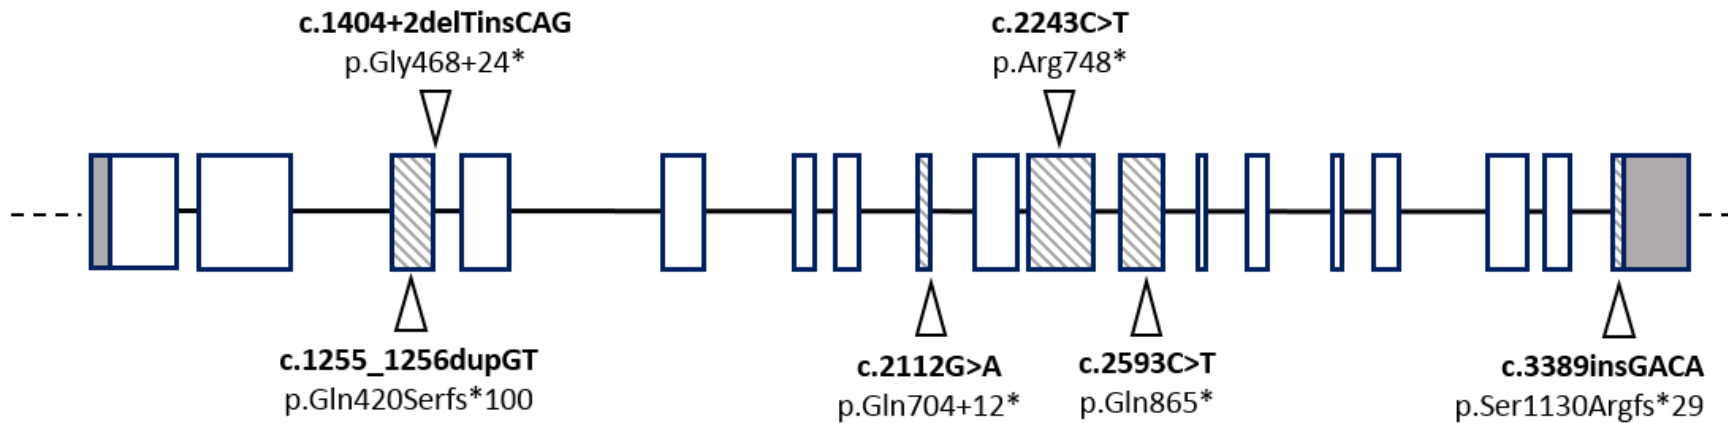

599  
 600 **Figure 2. HR gene and variants in the lykoi breed.** Genomic location of the identified variants associated with the  
 601 *Hairless* phenotype in the lykoi breed. UTR regions are presented in grey while exons that contain one of the six identified  
 602 variants are shaded. Variants location are identified by triangles, two of the identified variants disrupt a splicing site  
 603 (c.1404+2delTinsCAG and c.2112G>A) while all other variants (c.1255\_1256dupGT, c.2243C>T, c.2593C>T and  
 604 c.3389insCAGA) are predicted to produce a truncated protein product.  
 605

606

607 **Supplementary Figure 1. USA lineages of lykoi cats – Pedigree A.** Virginia and Tennessee lines were initially crossed  
608 to develop the lykoi breed. Additional cats, from Missouri and Canada, were subsequently added to the pedigree and  
609 used in the breeding program. Relationships of 67 cats provided by the breeder and confirmed with genetic testing of  
610 STRs when possible (data not shown). Arrow indicates the probands of each lineage. Circles indicate females, squares  
611 indicate males, and diamonds indicate unknown sex. Filled symbols represent cats with the lykoi hair coat. Half-filled  
612 represent obligate carriers. Symbols with question marks represent cats with unknown phenotype. A symbol with no fill  
613 indicates the cat is known to be completely unrelated and not expected to be a carrier. Cats are identified by a laboratory  
614 number. An open circle at the upper right of symbol is the cat that was whole genome sequenced. Genotype of the two  
615 *HR* frameshift variants, the exon 3 c.1255\_1256dupGT ( $hr^{TN}$ ), the exon 8 c.2112G>A stop codon variant ( $hr^{TX}$ ), the exon  
616 11 c.2593 C>T ( $hr^{Ca}$ ), and the exon 18 c.3389insGACA ( $hr^{VA}$ ) is listed below the symbol.

617

618 **Supplementary Figure 2. French lineages of lykoi cats - Pedigree B.** Cats were identified in France with the lykoi  
619 phenotype. Relationships of 16 cats provided by the breeder and confirmed with genetic testing of STRs when possible.  
620 Arrow indicates the probands of each lineage. Circles indicate females, squares indicate males. Filled symbols represent  
621 cats with the lykoi hair coat. Half-filled represent obligate carriers with normal hair coat. A symbol with no fill indicates the  
622 cat is known to be completely unrelated and not expected to be a carrier. Presented under each symbol are the

623 genotypes in the *HR* exon 3 c.1402+2T>CAG splice variant ( $hr^{Fr}$ ), the exon 8 c.2112G>A stop codon variant ( $hr^{TX}$ ) and the  
624 exon 18 insertion c.3393insGACA variant ( $hr^{VA}$ ). WT implies wildtype and INS implies insertion. Below the *HR* genotypes  
625 are the allelic sizes in basepairs for STRs: FCA149, F85, FCA075, and FCA229 [67,68]. Inferred genotypes are presented  
626 in parentheses. Cats L1 and L2 are compound heterozygote cats for variants previously identified in cats from the USA  
627 and Italy. Cat L3 has the exon 8 variant, likely originating from the USA foundation queen and inherited by L1 and L2 via  
628 cat 4. Cat L5 has the novel exon 3 c.1402+2T>CAG splice variant, inherited from the French founder cat L4. L6 produced  
629 five kittens from sires L2 and L5.  
630



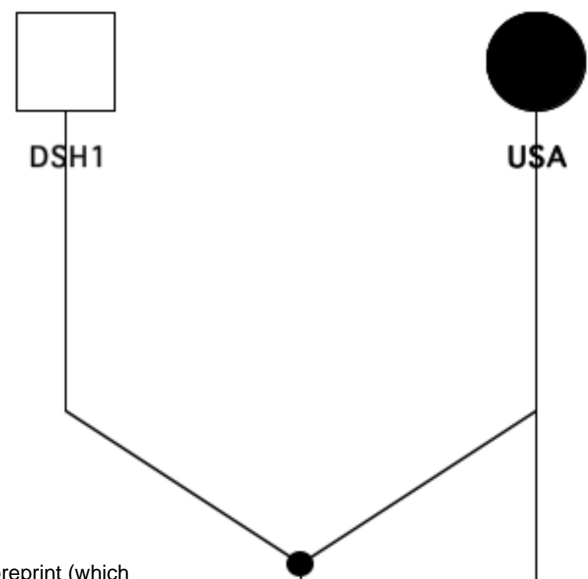

bioRxiv preprint doi: <https://doi.org/10.1101/2020.05.07.082719>; this version posted May 8, 2020. The copyright holder for this preprint (which was not certified by peer review) is the author/funder, who has granted bioRxiv a license to display the preprint in perpetuity. It is made available under aCC-BY-NC-ND 4.0 International license.

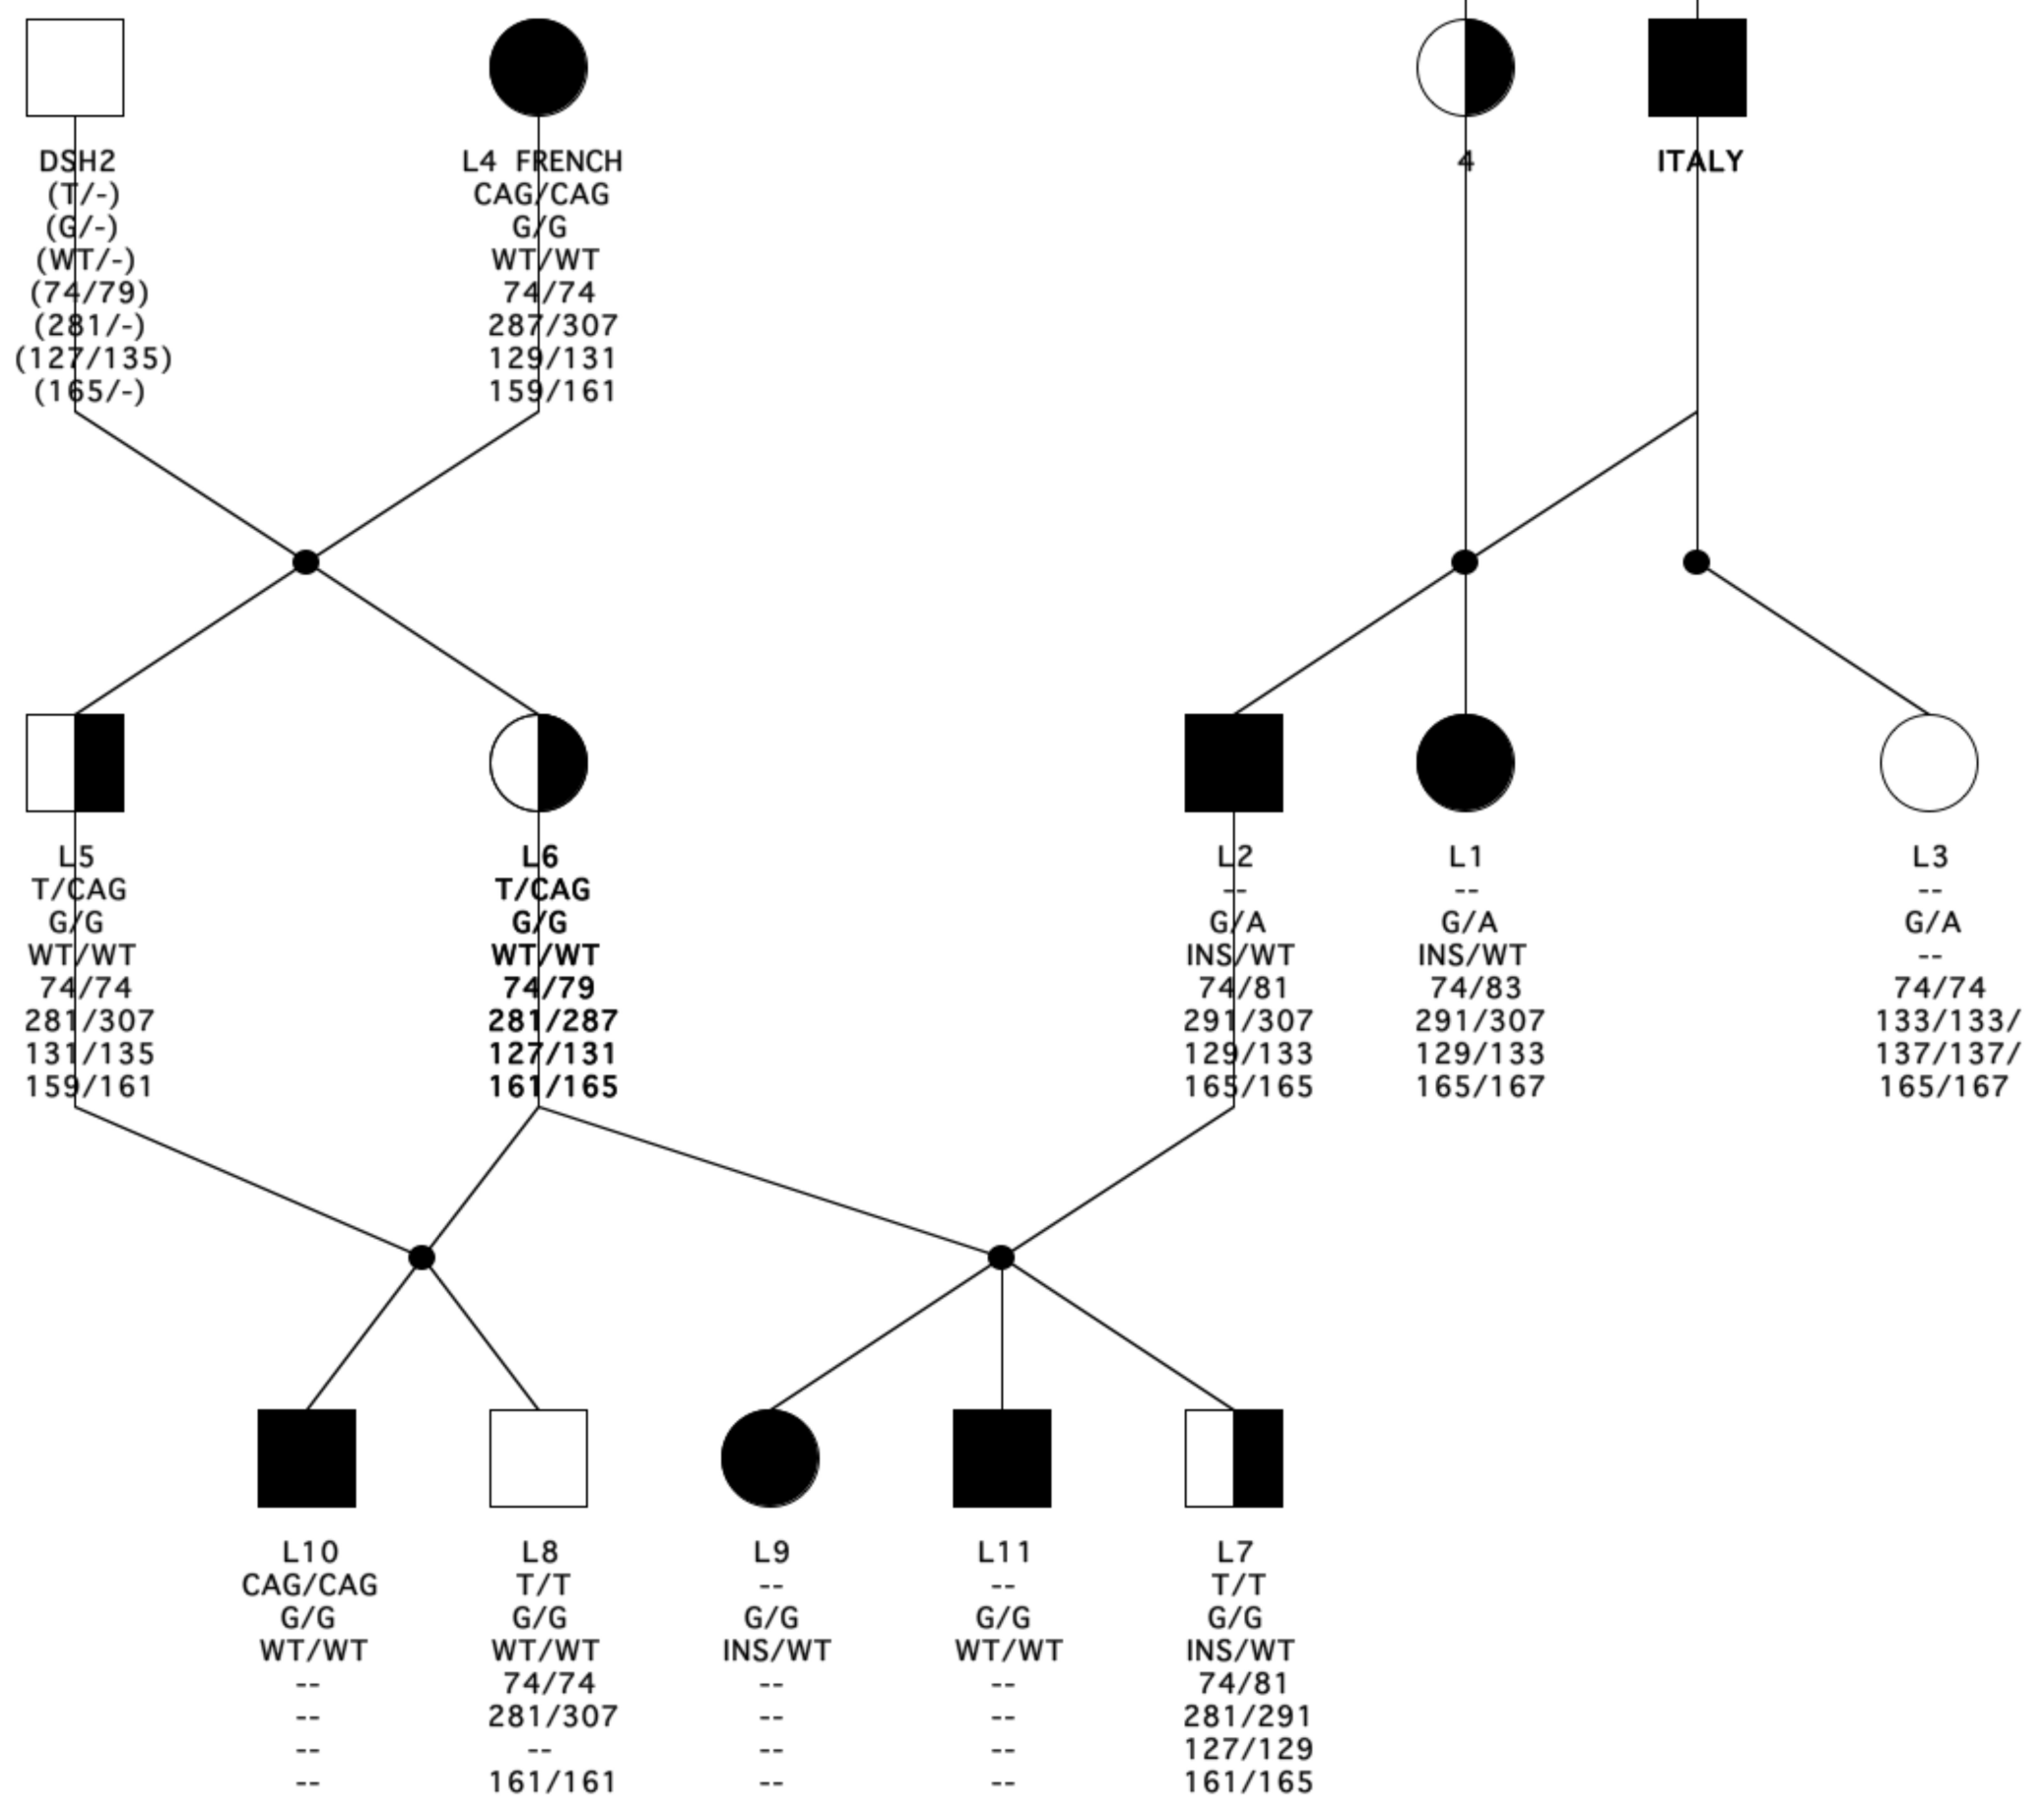

Source: https://www.biorxiv.org/content/10.1101/2020.05.07.082719v1.full.pdf
